# Supplementary material for: Mindboggling morphometry of human brains
Source: PubMed Central journal article supplement (PMC5322885; doi:10.1371/journal.pcbi.1005350), 2017-02-23
Supplement: pcbi.1005350.s001.pdf [file pcbi.1005350.s001.pdf]

## S1 Appendix: Mindboggle output directory tree

Mindboggle supplement (<http://mindboggle.info>)

This directory tree shows outputs from most, but not all, optional arguments, and does not include interim results stored in a working directory or downloaded files in a cache directory:

*Topmost directory of Mindboggle output for subject \$SUBJECT:*  
mindboggled/\$SUBJECT/

*Cortical surfaces with folds, sulci, fundi, or in MNI152 space:*

features/[left,right]\_cortical\_surface/  
folds.vtk  
sulci.vtk  
fundus\_per\_sulcus.vtk  
cortex\_in\_MNI152\_space.vtk

*Cortical surface labels or whole brain volume labels:*

labels/  
freesurfer\_wmparc\_labels\_in\_hybrid\_graywhite.nii.gz  
ants\_labels\_in\_hybrid\_graywhite.nii.gz  
[left,right]\_cortical\_surface/freesurfer\_cortex\_labels.vtk

*Cortical surfaces with shape measures per vertex:*

shapes/[left,right]\_cortical\_surface/  
area.vtk  
mean\_curvature.vtk  
geodesic\_depth.vtk  
travel\_depth.vtk  
freesurfer\_curvature.vtk  
freesurfer\_sulc.vtk  
freesurfer\_thickness.vtk

*Tables of volumetric shapes per label, surface shapes per vertex,  
and surface shape statistics per label, sulcus, or fundus:*

tables/  
volume\_per\_freesurfer\_label.csv  
volumes\_per\_ants\_label.csv  
thickinthehead\_per\_freesurfer\_cortex\_label.csv  
Thickinthehead\_per\_ants\_cortex\_label.csv  
[left,right]\_cortical\_surface/  
label\_shapes.csv  
sulcus\_shapes.csv  
fundus\_shapes.csv  
vertices.csv
