# Supplementary material for: Mindboggling morphometry of human brains
Source: PubMed Central journal article supplement (PMC5322885; doi:10.1371/journal.pcbi.1005350), 2017-02-23

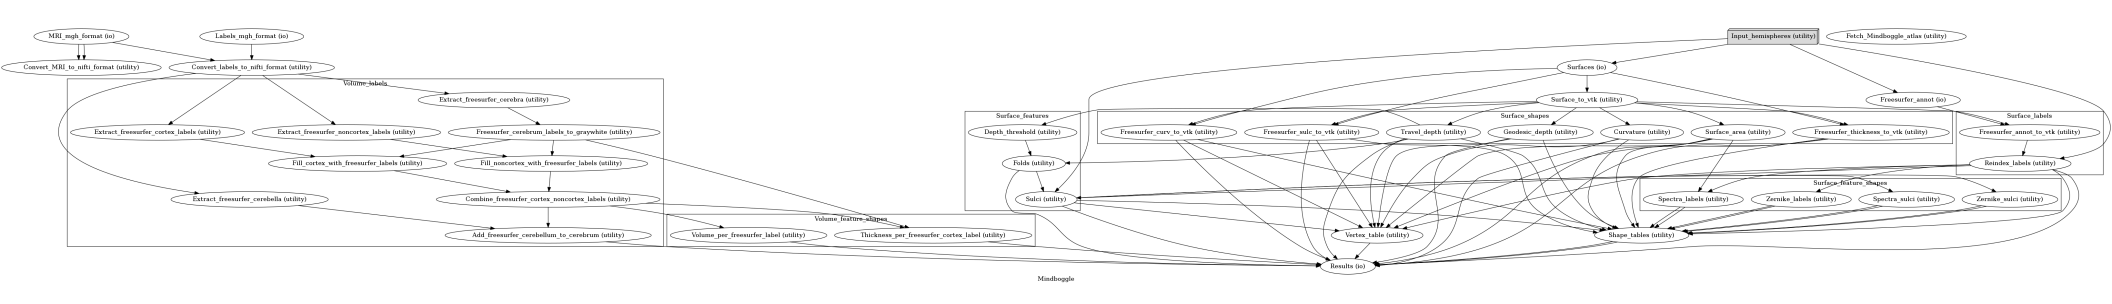

Supplement: pcbi.1005350.s002.pdf [file pcbi.1005350.s002.pdf]
