# Supplementary material for: Mindboggling morphometry of human brains
Source: PubMed Central journal article supplement (PMC5322885; doi:10.1371/journal.pcbi.1005350), 2017-02-23
Supplement: pcbi.1005350.s004.pdf [file pcbi.1005350.s004.pdf]

**S4 Appendix:**  
**Tables of shape differences between scans and between hemispheres**

Arno Klein  
Mindboggle supplement (<http://mindboggle.info>)

| <b>Cortical region</b>     | <b>volume</b> | <b>thick</b> | <b>area</b> | <b>travel</b> | <b>geodesic</b> | <b>curv</b> | <b>FScurv</b> | <b>FSthick</b> |
|----------------------------|---------------|--------------|-------------|---------------|-----------------|-------------|---------------|----------------|
| caudal anterior cingulate  | 0.04          | 0.05         | 0.05        | 0.10          | 0.10            | 0.06        | 0.18          | 0.04           |
| caudal middle frontal      | 0.04          | 0.05         | 0.05        | 0.03          | 0.03            | 0.05        | 0.07          | 0.04           |
| cuneus                     | 0.04          | 0.06         | 0.04        | 0.06          | 0.05            | 0.03        | 0.05          | 0.05           |
| entorhinal                 | 0.21          | 0.06         | 0.09        | 0.20          | 0.16            | 0.06        | 0.14          | 0.05           |
| fusiform                   | 0.03          | 0.04         | 0.03        | 0.04          | 0.05            | 0.03        | 0.05          | 0.03           |
| inferior parietal          | 0.03          | 0.04         | 0.02        | 0.03          | 0.02            | 0.04        | 0.05          | 0.04           |
| inferior temporal          | 0.05          | 0.04         | 0.03        | 0.07          | 0.06            | 0.03        | 0.06          | 0.02           |
| isthmus cingulate          | 0.04          | 0.08         | 0.07        | 0.11          | 0.13            | 0.04        | 0.11          | 0.04           |
| lateral occipital          | 0.03          | 0.02         | 0.03        | 0.08          | 0.07            | 0.03        | 0.04          | 0.04           |
| lateral orbitofrontal      | 0.09          | 0.05         | 0.04        | 0.08          | 0.10            | 0.05        | 0.09          | 0.04           |
| lingual                    | 0.03          | 0.04         | 0.04        | 0.05          | 0.06            | 0.03        | 0.04          | 0.04           |
| medial orbitofrontal       | 0.07          | 0.06         | 0.06        | 0.14          | 0.10            | 0.06        | 0.11          | 0.05           |
| middle temporal            | 0.03          | 0.05         | 0.03        | 0.04          | 0.03            | 0.03        | 0.05          | 0.03           |
| parahippocampal            | 0.04          | 0.04         | 0.04        | 0.11          | 0.12            | 0.06        | 0.09          | 0.03           |
| paracentral                | 0.07          | 0.04         | 0.05        | 0.08          | 0.08            | 0.04        | 0.07          | 0.06           |
| pars opercularis           | 0.04          | 0.06         | 0.04        | 0.03          | 0.03            | 0.03        | 0.06          | 0.03           |
| pars orbitalis             | 0.06          | 0.05         | 0.04        | 0.06          | 0.07            | 0.05        | 0.09          | 0.04           |
| pars triangularis          | 0.03          | 0.06         | 0.03        | 0.06          | 0.05            | 0.04        | 0.09          | 0.04           |
| pericalcarine              | 0.06          | 0.06         | 0.04        | 0.03          | 0.03            | 0.10        | 0.34          | 0.07           |
| postcentral                | 0.04          | 0.02         | 0.03        | 0.03          | 0.03            | 0.03        | 0.05          | 0.06           |
| posterior cingulate        | 0.04          | 0.08         | 0.05        | 0.09          | 0.09            | 0.05        | 0.09          | 0.04           |
| precentral                 | 0.04          | 0.03         | 0.02        | 0.02          | 0.02            | 0.03        | 0.04          | 0.04           |
| precuneus                  | 0.03          | 0.05         | 0.03        | 0.03          | 0.04            | 0.03        | 0.07          | 0.04           |
| rostral anterior cingulate | 0.04          | 0.09         | 0.06        | 0.10          | 0.10            | 0.08        | 0.23          | 0.05           |
| rostral middle frontal     | 0.04          | 0.07         | 0.03        | 0.04          | 0.03            | 0.05        | 0.06          | 0.04           |
| superior frontal           | 0.02          | 0.04         | 0.02        | 0.06          | 0.04            | 0.03        | 0.04          | 0.03           |
| superior parietal          | 0.04          | 0.03         | 0.02        | 0.03          | 0.03            | 0.04        | 0.05          | 0.05           |
| superior temporal          | 0.04          | 0.05         | 0.03        | 0.02          | 0.03            | 0.02        | 0.04          | 0.02           |
| supramarginal              | 0.04          | 0.04         | 0.03        | 0.04          | 0.04            | 0.04        | 0.07          | 0.04           |
| transverse temporal        | 0.06          | 0.07         | 0.04        | 0.02          | 0.03            | 0.04        | 0.07          | 0.06           |
| insula                     | 0.03          | 0.09         | 0.03        | 0.01          | 0.01            | 0.05        | 0.28          | 0.03           |

**Table A. Shape differences between MRI scans**

This table lists shape differences between two scans of the same brain averaged across 41 brains. The shape differences are computed for each of the 31 left cortical regions as the absolute value of the difference between the region's shape values between the two scans divided by the first scan's shape value. For the surface-based shape values, we used the median value for all vertices within each region. [thick = `thickinthehead` cortical thickness; travel = travel depth; geodesic = geodesic depth; curv = mean curvature; FScurv = FreeSurfer's curvature; FStick = FreeSurfer's thickness]

| <b>Cortical regions</b>    | <b>volume</b> | <b>thick</b> | <b>area</b> | <b>travel</b> | <b>geodesic</b> | <b>curv</b> | <b>FScurv</b> | <b>FSthick</b> |
|----------------------------|---------------|--------------|-------------|---------------|-----------------|-------------|---------------|----------------|
| caudal anterior cingulate  | 0.26          | 0.06         | 0.32        | 0.27          | 0.21            | 0.11        | 0.32          | 0.06           |
| caudal middle frontal      | 0.14          | 0.04         | 0.20        | 0.14          | 0.13            | 0.10        | 0.16          | inf            |
| cuneus                     | 0.12          | 0.06         | 0.17        | 0.32          | 0.24            | 0.10        | 0.15          | 0.04           |
| entorhinal                 | 0.17          | 0.08         | 0.23        | 0.41          | 0.30            | 0.10        | 0.21          | 0.09           |
| fusiform                   | 0.08          | 0.05         | 0.15        | 0.14          | 0.13            | 0.07        | 0.10          | 0.04           |
| inferior parietal          | 0.23          | 0.05         | 0.25        | 0.11          | 0.11            | 0.06        | 0.09          | 0.03           |
| inferior temporal          | 0.09          | 0.04         | 0.14        | 0.21          | 0.16            | 0.07        | 0.08          | 0.05           |
| isthmus cingulate          | 0.14          | 0.04         | 0.17        | 0.21          | 0.20            | 0.10        | 0.18          | 0.07           |
| lateral occipital          | 0.09          | 0.04         | 0.14        | 0.22          | 0.18            | 0.05        | 0.07          | 0.04           |
| lateral orbitofrontal      | 0.06          | 0.05         | 0.11        | 0.23          | 0.26            | 0.09        | 0.12          | 0.05           |
| lingual                    | 0.11          | 0.04         | 0.12        | 0.15          | 0.13            | 0.08        | 0.11          | 0.05           |
| medial orbitofrontal       | 0.08          | 0.05         | 0.18        | 0.27          | 0.19            | 0.10        | 0.17          | 0.06           |
| middle temporal            | 0.11          | 0.04         | 0.12        | 0.17          | 0.15            | 0.07        | 0.10          | 0.05           |
| parahippocampal            | 0.11          | 0.05         | 0.13        | 0.36          | 0.29            | 0.15        | 0.19          | 0.08           |
| paracentral                | 0.16          | 0.04         | 0.18        | 0.25          | 0.20            | 0.08        | 0.16          | 0.04           |
| pars opercularis           | 0.18          | 0.04         | 0.33        | 0.20          | 0.23            | 0.10        | 0.17          | 0.05           |
| pars orbitalis             | 0.22          | 0.05         | 0.32        | 0.37          | 0.40            | 0.13        | 0.20          | 0.06           |
| pars triangularis          | 0.20          | 0.05         | 0.32        | 0.30          | 0.24            | 0.12        | 0.21          | 0.06           |
| pericalcarine              | 0.18          | 0.06         | 0.21        | 0.10          | 0.11            | 0.45        | inf           | 0.06           |
| postcentral                | 0.09          | 0.03         | 0.12        | 0.13          | 0.13            | 0.10        | 0.14          | 0.05           |
| posterior cingulate        | 0.13          | 0.04         | 0.13        | 0.21          | 0.18            | 0.09        | 0.15          | 0.05           |
| precentral                 | 0.07          | 0.03         | 0.09        | 0.10          | 0.10            | 0.07        | 0.11          | 0.04           |
| precuneus                  | 0.06          | 0.03         | 0.11        | 0.17          | 0.14            | 0.07        | 0.13          | 0.03           |
| rostral anterior cingulate | 0.22          | 0.07         | 0.36        | 0.21          | 0.18            | 0.10        | 1.23          | 0.06           |
| rostral middle frontal     | 0.08          | 0.03         | 0.17        | 0.14          | 0.12            | 0.08        | 0.09          | 0.04           |
| superior frontal           | 0.06          | 0.03         | 0.14        | 0.19          | 0.14            | 0.06        | 0.07          | 0.04           |
| superior parietal          | 0.07          | 0.02         | 0.15        | 0.12          | 0.12            | 0.07        | 0.12          | 0.03           |
| superior temporal          | 0.07          | 0.03         | 0.12        | 0.10          | 0.10            | 0.09        | 0.11          | 0.04           |
| supramarginal              | 0.12          | 0.03         | 0.19        | 0.17          | 0.16            | 0.08        | 0.13          | 0.04           |
| transverse temporal        | 0.24          | 0.06         | 0.24        | 0.10          | 0.10            | 0.18        | 0.27          | 0.06           |
| insula                     | 0.06          | 0.04         | 0.07        | 0.05          | 0.03            | 0.10        | 0.32          | 0.05           |

**Table B. Shape differences between left and right hemispheres**

Shape differences between hemispheres are computed for each of the 31 cortical regions in all 101 of the Mindboggle-101 subjects as the absolute value of the difference between the region's left and right shape values divided by the left shape value. For the surface-based shape values, we used the median value for all vertices within each region. (Refer to **Table A** caption for

abbreviations.)
