# Supplementary material for: Mindboggling morphometry of human brains
Source: PubMed Central journal article supplement (PMC5322885; doi:10.1371/journal.pcbi.1005350), 2017-02-23
Supplement: pcbi.1005350.s005.pdf [file pcbi.1005350.s005.pdf]

# S5 Appendix:

## Variance components analysis of the shapes of 62 cortical regions in 101 human brains

---

Elias Chaibub Neto\* and Arno Klein  
Sage Bionetworks, Seattle, Washington, USA  
\* E-mail: elias.chaibub.neto@sagebase.org

For more detailed plots, including summary statistical heatmaps and variation plots for shape measures computed on manually labeled cortical regions and sulci, please see: Neto, EC, and Klein, A. (2014). `shape_variation_Mindboggle101_2014`. Open Science Framework. [osf.io/gzshf](https://osf.io/gzshf)

### Methods

#### Data structure

The data consist of repeated measurements on 5 distinct real-valued shape measures computed by Mindboggle (<http://mindboggle.info>) for each of 31 distinct regions per brain hemisphere in each of the 101 subjects. Each subject was scanned at one of 5 different laboratories. The data were organized in a nested fashion: brain hemisphere (side) is nested within subject, and subject is nested within laboratory (lab). In addition to the 5 shape measurements (**mean curvature**, **travel depth**, **geodesic depth**, **FreeSurfer convexity**, and **FreeSurfer thickness**) and the 3 nested classification factors (lab, subject, and hemisphere), the data also include 3 covariates: (i) **sex**, composed of 2 levels (**M**  $\equiv$  male, **F**  $\equiv$  female); (ii) **handedness**, composed of 2 levels (**L**  $\equiv$  left-handed, **R**  $\equiv$  right-handed) after we re-labeled 2 ambidextrous subjects as left-handed; and (iii) **age**, an integer variable.

#### Statistical modeling

Given the grouped nature of the data, we used linear mixed models for the statistical modeling of the data. To assess the importance of each of the covariates and nested classification factors, we fitted 24 distinct models for each shape measure and brain region combination. Tables 1 and 2 present, respectively, the 24 models and the corresponding dictionary of model terms. Table 3 presents the same 24 models expressed in R notation/syntax.

Models 1 to 8 have only fixed effects and ignore the grouping structure of the data. These simple models were used as baseline models for comparison with more complex models including nested classification factors to account for the grouping structure in the data.

Models 9 to 16 are nested mixed effect models with **sex**, **handedness**, and **age** modeled as fixed effects and **subject** and **side** (within **subject**) random effects. Note that the variance components estimates  $\hat{\sigma}_{subj}^2$ ,  $\hat{\sigma}_{side}^2$  and  $\hat{\sigma}^2$  provide the following decomposition of the total variance of the shape measure:

$$\begin{aligned} \text{total variance} &= \text{variance between subjects} \\ &+ \text{variance between brain sides within a subject} \\ &+ \text{variance within brain sides} \end{aligned}$$

Models 17 to 24 include the extra “subject within lab” nesting level. For these models, the variance components estimates  $\hat{\sigma}_{lab}^2$ ,  $\hat{\sigma}_{subj}^2$ ,  $\hat{\sigma}_{side}^2$  and  $\hat{\sigma}^2$  provide a decomposition of the total variance of the shape measure into:

total variance = variance between labs  
+ variance between subjects within a lab  
+ variance between brain sides within a subject  
+ variance within brain sides

|           |                                                                                                                                                                                                                                                                              |
|-----------|------------------------------------------------------------------------------------------------------------------------------------------------------------------------------------------------------------------------------------------------------------------------------|
| model 1:  | $y_r = \mu + \epsilon_r$                                                                                                                                                                                                                                                     |
| model 2:  | $y_{ir} = \mu + \alpha_i + \epsilon_{ir}$                                                                                                                                                                                                                                    |
| model 3:  | $y_{jr} = \mu + \gamma_j + \epsilon_{jr}$                                                                                                                                                                                                                                    |
| model 4:  | $y_r = \mu + \beta x_r + \epsilon_r$                                                                                                                                                                                                                                         |
| model 5:  | $y_{ijr} = \mu + \alpha_i + \gamma_j + (\alpha\gamma)_{ij} + \epsilon_{ijr}$                                                                                                                                                                                                 |
| model 6:  | $y_{ir} = \mu + \alpha_i + \beta_i x_{ir} + \epsilon_{ir}$                                                                                                                                                                                                                   |
| model 7:  | $y_{jr} = \mu + \gamma_j + \beta_j x_{jr} + \epsilon_{jr}$                                                                                                                                                                                                                   |
| model 8:  | $y_{ijr} = \mu + \alpha_i + \gamma_j + (\alpha\gamma)_{ij} + \beta_{ij} x_{ijr} + \epsilon_{ijr}$<br>$\epsilon. \sim N(0, \sigma^2)$                                                                                                                                         |
| model 9:  | $y_{klr} = \mu + b_k + b_{kl} + \epsilon_{klr}$                                                                                                                                                                                                                              |
| model 10: | $y_{iklr} = \mu + \alpha_i + b_k + b_{kl} + \epsilon_{iklr}$                                                                                                                                                                                                                 |
| model 11: | $y_{jklr} = \mu + \gamma_j + b_k + b_{kl} + \epsilon_{jklr}$                                                                                                                                                                                                                 |
| model 12: | $y_{klr} = \mu + \beta x_{klr} + b_k + b_{kl} + \epsilon_{klr}$                                                                                                                                                                                                              |
| model 13: | $y_{ijklr} = \mu + \alpha_i + \gamma_j + (\alpha\gamma)_{ij} + b_k + b_{kl} + \epsilon_{ijklr}$                                                                                                                                                                              |
| model 14: | $y_{iklr} = \mu + \alpha_i + \beta_i x_{iklr} + b_k + b_{kl} + \epsilon_{iklr}$                                                                                                                                                                                              |
| model 15: | $y_{jklr} = \mu + \gamma_j + \beta_j x_{jklr} + b_k + b_{kl} + \epsilon_{jklr}$                                                                                                                                                                                              |
| model 16: | $y_{ijklr} = \mu + \alpha_i + \gamma_j + (\alpha\gamma)_{ij} + \beta_{ij} x_{ijklr} + b_k + b_{kl} + \epsilon_{ijklr}$<br>$b_k \sim N(0, \sigma_{subj}^2), b_{kl} \sim N(0, \sigma_{side}^2), \epsilon. \sim N(0, \sigma^2)$                                                 |
| model 17: | $y_{klmr} = \mu + b_m + b_{mk} + b_{mkl} + \epsilon_{klmr}$                                                                                                                                                                                                                  |
| model 18: | $y_{iklmr} = \mu + \alpha_i + b_m + b_{mk} + b_{mkl} + \epsilon_{iklmr}$                                                                                                                                                                                                     |
| model 19: | $y_{jkmlr} = \mu + \gamma_j + b_m + b_{mk} + b_{mkl} + \epsilon_{jkmlr}$                                                                                                                                                                                                     |
| model 20: | $y_{klmr} = \mu + \beta x_{klmr} + b_m + b_{mk} + b_{mkl} + \epsilon_{klmr}$                                                                                                                                                                                                 |
| model 21: | $y_{ijklmr} = \mu + \alpha_i + \gamma_j + (\alpha\gamma)_{ij} + b_m + b_{mk} + b_{mkl} + \epsilon_{ijklmr}$                                                                                                                                                                  |
| model 22: | $y_{iklmr} = \mu + \alpha_i + \beta_i x_{iklmr} + b_m + b_{mk} + b_{mkl} + \epsilon_{iklmr}$                                                                                                                                                                                 |
| model 23: | $y_{jkmlr} = \mu + \gamma_j + \beta_j x_{jkmlr} + b_m + b_{mk} + b_{mkl} + \epsilon_{jkmlr}$                                                                                                                                                                                 |
| model 24: | $y_{ijklmr} = \mu + \alpha_i + \gamma_j + (\alpha\gamma)_{ij} + \beta_{ij} x_{ijklmr} + b_m + b_{mk} + b_{mkl} + \epsilon_{ijklmr}$<br>$b_m \sim N(0, \sigma_{lab}^2), b_{mk} \sim N(0, \sigma_{subj}^2), b_{mkl} \sim N(0, \sigma_{side}^2), \epsilon. \sim N(0, \sigma^2)$ |

**Table 1.** Linear models.

---

|                         |                                                                                                   |
|-------------------------|---------------------------------------------------------------------------------------------------|
| $y$ :                   | shape measure                                                                                     |
| $x$ :                   | age (integer valued)                                                                              |
| $\alpha_i$ :            | sex effect ( $i = 1, 2$ , 1 $\equiv$ female, 2 $\equiv$ male)                                     |
| $\gamma_j$ :            | handedness effect ( $j = 1, 2$ , 1 $\equiv$ left-handed, 2 $\equiv$ right-handed)                 |
| $(\alpha\gamma)_{ij}$ : | sex by handedness interaction                                                                     |
| $\beta$ :               | age effect                                                                                        |
| $b_k$ :                 | subject random effect, $k = 1, \dots, 101$                                                        |
| $b_{kl}$ :              | side within subject random effect, $l = 1, 2$ (1 $\equiv$ left-surface, 2 $\equiv$ right-surface) |
| $b_m$ :                 | lab random effect, $m = 1, \dots, 5$                                                              |
| $b_{mk}$ :              | subject within lab random effect                                                                  |
| $b_{mkl}$ :             | side within subject (within lab) random effect                                                    |
| $\epsilon$ :            | residual error term                                                                               |

---

**Table 2.** Dictionary of model terms for Table 1.

---

|           |                                                                        |
|-----------|------------------------------------------------------------------------|
| model 1:  | <code>measure ~ 1</code>                                               |
| model 2:  | <code>measure ~ sex</code>                                             |
| model 3:  | <code>measure ~ handedness</code>                                      |
| model 4:  | <code>measure ~ age</code>                                             |
| model 5:  | <code>measure ~ sex * handedness</code>                                |
| model 6:  | <code>measure ~ sex * age</code>                                       |
| model 7:  | <code>measure ~ handedness * age</code>                                |
| model 8:  | <code>measure ~ sex * handedness * age</code>                          |
| <hr/>     |                                                                        |
| model 9:  | <code>measure ~ 1 + (1   subject/side)</code>                          |
| model 10: | <code>measure ~ sex + (1   subject/side)</code>                        |
| model 11: | <code>measure ~ handedness + (1   subject/side)</code>                 |
| model 12: | <code>measure ~ age + (1   subject/side)</code>                        |
| model 13: | <code>measure ~ sex * handedness + (1   subject/side)</code>           |
| model 14: | <code>measure ~ sex * age + (1   subject/side)</code>                  |
| model 15: | <code>measure ~ handedness * age + (1   subject/side)</code>           |
| model 16: | <code>measure ~ sex * handedness * age + (1   subject/side)</code>     |
| <hr/>     |                                                                        |
| model 17: | <code>measure ~ 1 + (1   lab/subject/side)</code>                      |
| model 18: | <code>measure ~ sex + (1   lab/subject/side)</code>                    |
| model 19: | <code>measure ~ handedness + (1   lab/subject/side)</code>             |
| model 20: | <code>measure ~ age + (1   lab/subject/side)</code>                    |
| model 21: | <code>measure ~ sex * handedness + (1   lab/subject/side)</code>       |
| model 22: | <code>measure ~ sex * age + (1   lab/subject/side)</code>              |
| model 23: | <code>measure ~ handedness * age + (1   lab/subject/side)</code>       |
| model 24: | <code>measure ~ sex * handedness * age + (1   lab/subject/side)</code> |

---

**Table 3.** Same linear models in Table 1 represented in R notation/syntax.

For each shape measure and brain region combination, we used the BIC score to select the best model among these 24 competing models. A BIC (Bayesian Information Criterion) score is a goodness of fit measure used to perform model selection among models with different dimensions (i.e., different number of parameters). The BIC score is proportional to the negative log likelihood of the model penalized by the number of parameters in the model. It strikes a balance between model fit (measured by the log-likelihood score) and model complexity (measured by the number of parameters in the model). In the context of linear models, an over-parameterized model will always have a larger log-likelihood score than a more parsimonious model, but it will also likely overfit the data. Nonetheless, by including a penalty proportional to the number of parameters in the model the BIC score can be used to compare models with different dimensions since the over-parameterized models are penalized to a greater extent. The smaller the BIC score, the better the model fits the data.

## Results

Models 15 and 23 were the best models for the `mean curvature`, `travel depth`, `FreeSurfer convexity`, and `FreeSurfer thickness` shape measures across the 31 brain regions. Both models include `handedness` and `age` as fixed effects. They only differ by the inclusion of the extra “`subject within lab`” nesting level in model 23. Therefore, in the following figures we present the mean and variance component estimates for model 15 for these four shape measures. Model 9 tended to be ranked first across most brain regions (followed by model 17) for the `geodesic depth` shape measure, so we present the estimates derived from model 9 for `geodesic depth`.

Figure 1 presents an overview of the variance components decomposition results. For all shape measures and brain regions, the bulk of the variability was concentrated in the residual component (note that the results are plotted in a  $\log_{10}$  scale). *For a more detailed picture of a given shape measure and brain region you can inspect the corresponding variation plot ([osf.io/gzshf](https://osf.io/gzshf)).*

Figure 2 presents the estimates of the population means derived from the mixed effects models. Note that for `geodesic depth` we have a single column (`overall.mu`) which corresponds to the estimate of the  $\mu$  parameter in model 9. For all other shape measures we have 2 columns (`left.handed.mu`, `right.handed.mu`) which correspond, respectively, to the estimates of  $\mu + \gamma_1$  and  $\mu + \gamma_2$  parameters in model 15 (that is, the population means for left-handed and right-handed people, respectively).

Tables 1 to 5 present the data used in the generation of these figures. Tables 6 to 9 present BIC scores for four of the shape measures.

# Figures

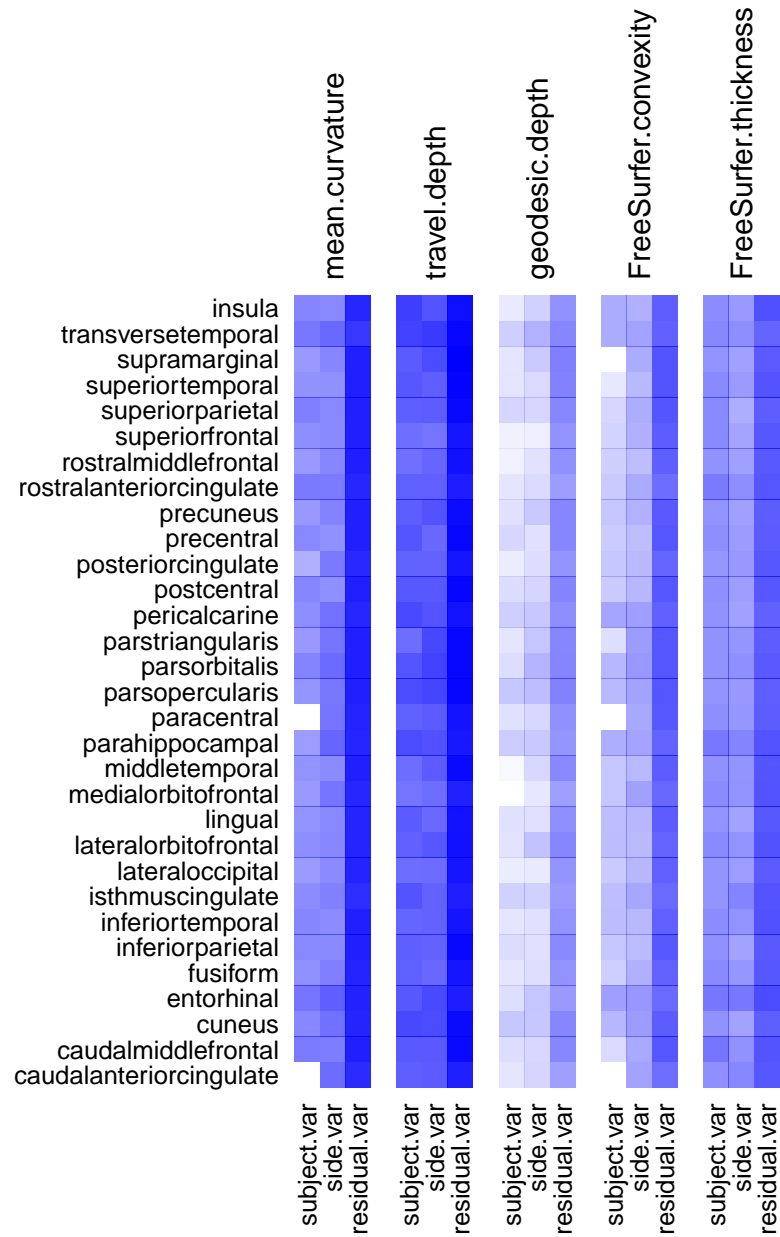

**Figure 1.** Variance components estimates in  $\log_{10}$  scale.

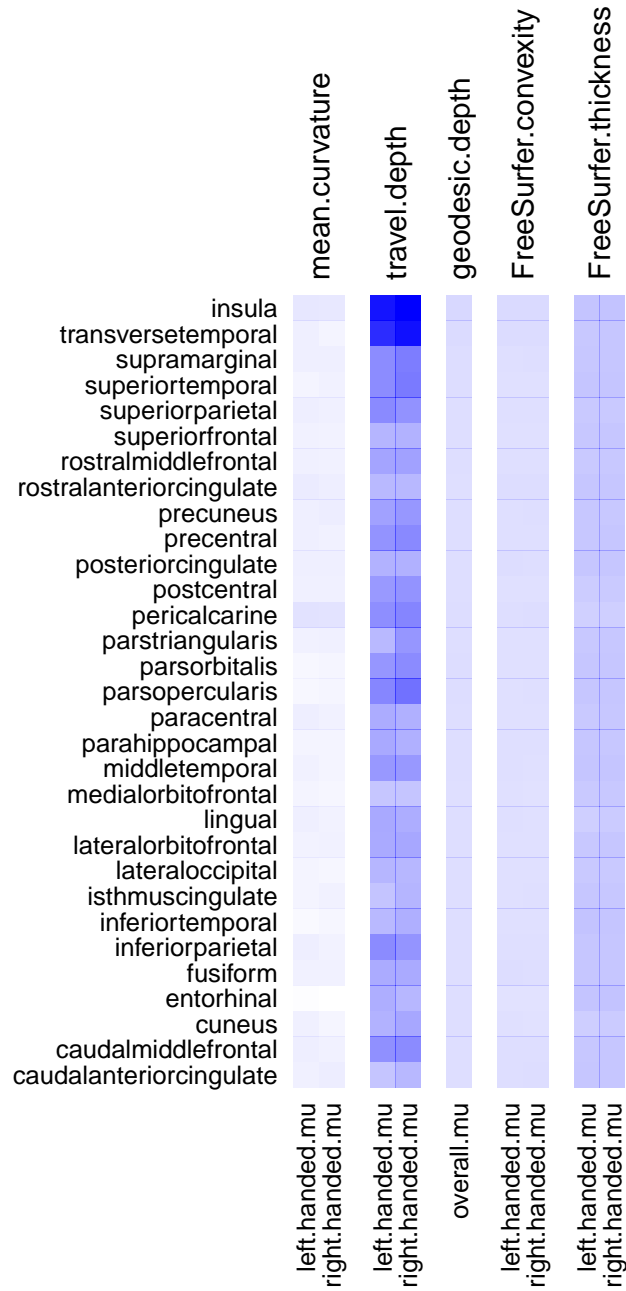

Figure 2. Mean estimates.

## Tables

Table 1: Mean curvature mean and variance values per region

|                              | mu_L       | mu_R       | sig2_subj   | sig2_side  | sig2      |
|------------------------------|------------|------------|-------------|------------|-----------|
| caudalanteriorcingulate: 2   | -1.9646759 | -1.6133236 | 0.000000000 | 0.11911361 | 5.637640  |
| caudalmiddlefrontal: 3       | -1.6939180 | -2.0584152 | 0.047309070 | 0.04126164 | 11.673396 |
| cuneus: 5                    | -1.9004044 | -2.4063073 | 0.023036867 | 0.08529971 | 8.223499  |
| entorhinal: 6                | -3.3538056 | -3.6821572 | 0.071264116 | 0.26433676 | 8.932195  |
| fusiform: 7                  | -2.0206615 | -2.1021870 | 0.013778937 | 0.03698830 | 8.328005  |
| inferiorparietal: 8          | -1.7879809 | -2.1505798 | 0.021603439 | 0.01871475 | 11.584457 |
| inferiortemporal: 9          | -2.9024409 | -2.4853642 | 0.025988620 | 0.01718070 | 10.269853 |
| isthmuscingulate: 10         | -2.3052108 | -2.0530746 | 0.016935931 | 0.03475560 | 5.069706  |
| lateraloccipital: 11         | -2.3293248 | -2.4735612 | 0.007083792 | 0.01782347 | 8.635402  |
| lateralorbitofrontal: 12     | -2.1530630 | -2.1100545 | 0.015932655 | 0.02256718 | 7.945797  |
| lingual: 13                  | -1.8660691 | -2.1481973 | 0.010326448 | 0.02142574 | 7.951898  |
| medialorbitofrontal: 14      | -2.2619382 | -2.5459289 | 0.007769905 | 0.06992965 | 7.261699  |
| middletemporal: 15           | -2.0636435 | -2.2855140 | 0.011711308 | 0.01824557 | 10.937725 |
| parahippocampal: 16          | -2.3290528 | -2.2976986 | 0.006315487 | 0.15737938 | 7.617145  |
| paracentral: 17              | -1.7413352 | -2.1053616 | 0.000000000 | 0.07143120 | 8.443684  |
| parsopercularis: 18          | -2.5784662 | -2.4002403 | 0.009878078 | 0.05879899 | 11.198582 |
| parsorbitalis: 19            | -2.6498301 | -2.4368318 | 0.028455308 | 0.13310886 | 11.540800 |
| parstriangularis: 20         | -2.0630806 | -1.9927985 | 0.008045435 | 0.06898698 | 11.845844 |
| pericalcarine: 21            | -0.3627639 | -0.4734272 | 0.015745534 | 0.07658601 | 7.218891  |
| postcentral: 22              | -1.9334892 | -1.9197625 | 0.023211111 | 0.01508505 | 10.290260 |
| posteriorcingulate: 23       | -1.8144612 | -1.8325023 | 0.001976674 | 0.04737118 | 6.713240  |
| precentral: 24               | -1.8095272 | -2.0533020 | 0.019708800 | 0.01425260 | 11.074243 |
| precuneus: 25                | -1.8450386 | -1.6291366 | 0.008104536 | 0.03044350 | 10.219587 |
| rostralanteriorcingulate: 26 | -1.3037218 | -1.6773242 | 0.049823919 | 0.04536554 | 7.100370  |
| rostralmiddlefrontal: 27     | -1.9045841 | -2.0901363 | 0.007940850 | 0.02426930 | 12.306761 |
| superiorfrontal: 28          | -2.1057824 | -2.2150371 | 0.015505640 | 0.01910455 | 10.370381 |
| superiorparietal: 29         | -1.7866883 | -1.9290479 | 0.035581720 | 0.01956873 | 11.749346 |
| superiortemporal: 30         | -2.3379290 | -2.0486796 | 0.012312071 | 0.01418901 | 11.393688 |
| supramarginal: 31            | -1.8534484 | -1.8222733 | 0.007644038 | 0.02335495 | 11.681114 |
| transversetemporal: 34       | -1.8348014 | -2.3305493 | 0.058914890 | 0.14041556 | 2.763680  |
| insula: 35                   | -0.8940259 | -0.9301153 | 0.027015605 | 0.01969170 | 7.350533  |

Table 2: Travel depth mean and variance values per region

|                              | mu_L      | mu_R      | sig2_subj  | sig2_side  | sig2      |
|------------------------------|-----------|-----------|------------|------------|-----------|
| caudalanteriorcingulate: 2   | 2.908827  | 4.390086  | 0.26273312 | 0.32216772 | 11.166426 |
| caudalmiddlefrontal: 3       | 8.822163  | 9.321539  | 0.34371635 | 0.35037770 | 41.476752 |
| cuneus: 5                    | 4.939416  | 6.263497  | 0.93816728 | 0.74787219 | 38.870542 |
| entorhinal: 6                | 5.364478  | 4.552021  | 0.36538268 | 0.90667992 | 13.159925 |
| fusiform: 7                  | 5.876810  | 5.952691  | 0.23411494 | 0.14745465 | 20.012670 |
| inferiorparietal: 8          | 9.295072  | 8.337746  | 0.26474506 | 0.20183172 | 41.811629 |
| inferiortemporal: 9          | 4.183588  | 5.331245  | 0.16666735 | 0.20352165 | 21.510881 |
| isthmuscingulate: 10         | 3.022776  | 4.677700  | 0.52506112 | 0.20787633 | 12.006928 |
| lateraloccipital: 11         | 4.647892  | 4.555075  | 0.11287421 | 0.12218326 | 20.127287 |
| lateralorbitofrontal: 12     | 5.978216  | 6.316145  | 0.21471711 | 0.39148900 | 26.575029 |
| lingual: 13                  | 6.085052  | 5.648819  | 0.32105738 | 0.14102661 | 25.839482 |
| medialorbitofrontal: 14      | 2.784618  | 2.992110  | 0.07467968 | 0.11202420 | 9.624075  |
| middletemporal: 15           | 7.800564  | 7.855389  | 0.10696417 | 0.33047961 | 39.614431 |
| parahippocampal: 16          | 6.029435  | 5.199095  | 0.76328940 | 0.57625415 | 16.390874 |
| paracentral: 17              | 5.693255  | 5.220015  | 0.20942002 | 0.32854616 | 23.648017 |
| parsopercularis: 18          | 9.835592  | 12.244041 | 0.77089314 | 1.19907867 | 59.457262 |
| parsorbitalis: 19            | 8.052297  | 9.313831  | 0.42789908 | 1.57559078 | 49.665636 |
| parstriangularis: 20         | 4.325956  | 8.035255  | 0.11369699 | 1.08169516 | 48.826880 |
| pericalcarine: 21            | 9.027955  | 10.051042 | 0.90535113 | 0.54249963 | 24.059514 |
| postcentral: 22              | 7.689919  | 8.539968  | 0.36657728 | 0.36906470 | 56.107320 |
| posteriorcingulate: 23       | 4.943409  | 5.034161  | 0.20527867 | 0.20318742 | 19.305122 |
| precentral: 24               | 8.533288  | 9.499526  | 0.43347605 | 0.15283913 | 49.320424 |
| precuneus: 25                | 6.857130  | 7.967200  | 0.28162255 | 0.54277301 | 36.888115 |
| rostralanteriorcingulate: 26 | 4.272170  | 4.433297  | 0.24899008 | 0.23633339 | 13.011533 |
| rostralmiddlefrontal: 27     | 6.493383  | 6.794857  | 0.08813629 | 0.16354173 | 27.046853 |
| superiorfrontal: 28          | 4.772673  | 4.970345  | 0.09316461 | 0.07220226 | 20.145720 |
| superiorparietal: 29         | 9.410513  | 8.574138  | 0.26077990 | 0.31168172 | 43.602626 |
| superiortemporal: 30         | 9.175236  | 11.322221 | 0.38526973 | 0.26043419 | 61.570555 |
| supramarginal: 31            | 9.221037  | 10.885826 | 0.33357991 | 0.79940538 | 71.311463 |
| transversetemporal: 34       | 20.024956 | 23.075414 | 1.51919779 | 2.32137437 | 44.712003 |
| insula: 35                   | 22.497879 | 24.832637 | 1.76948715 | 0.54084168 | 29.289498 |



Table 3: Geodesic depth mean and variance values per region

|                              | mu         | sig2_subj    | sig2_side    | sig2        |
|------------------------------|------------|--------------|--------------|-------------|
| caudalanteriorcingulate: 2   | 0.10876145 | 8.540137e-05 | 2.155707e-04 | 0.005735945 |
| caudalmiddlefrontal: 3       | 0.20672329 | 1.405328e-04 | 1.916866e-04 | 0.022901589 |
| cuneus: 5                    | 0.16442286 | 5.096960e-04 | 5.015735e-04 | 0.023892951 |
| entorhinal: 6                | 0.11356239 | 1.359486e-04 | 6.071509e-04 | 0.007505954 |
| fusiform: 7                  | 0.14956220 | 8.285491e-05 | 1.341376e-04 | 0.010899991 |
| inferiorparietal: 8          | 0.19035957 | 1.540057e-04 | 1.194686e-04 | 0.020971043 |
| inferiortemporal: 9          | 0.13032484 | 8.443557e-05 | 1.175144e-04 | 0.011829854 |
| isthmuscingulate: 10         | 0.13021684 | 2.913291e-04 | 2.894364e-04 | 0.007531595 |
| lateraloccipital: 11         | 0.10758544 | 6.034204e-05 | 6.777100e-05 | 0.010589475 |
| lateralorbitofrontal: 12     | 0.18916881 | 9.206473e-05 | 7.286072e-04 | 0.023227473 |
| lingual: 13                  | 0.14397953 | 1.143569e-04 | 1.077340e-04 | 0.014926456 |
| medialorbitofrontal: 14      | 0.07873026 | 1.731992e-05 | 7.859723e-05 | 0.005881223 |
| middletemporal: 15           | 0.17461209 | 2.952878e-05 | 1.818783e-04 | 0.019642103 |
| parahippocampal: 16          | 0.13303999 | 3.732840e-04 | 4.478648e-04 | 0.009880747 |
| paracentral: 17              | 0.13349202 | 1.134478e-04 | 1.929274e-04 | 0.013616939 |
| parsopercularis: 18          | 0.28611134 | 5.104992e-04 | 8.448066e-04 | 0.031570206 |
| parsorbitalis: 19            | 0.21913221 | 1.422498e-04 | 1.627297e-03 | 0.027178661 |
| parstriangularis: 20         | 0.18745774 | 8.140182e-05 | 5.725029e-04 | 0.024734192 |
| pericalcarine: 21            | 0.24349602 | 3.551833e-04 | 4.585307e-04 | 0.015534629 |
| postcentral: 22              | 0.19885442 | 1.500128e-04 | 2.160770e-04 | 0.028445429 |
| posteriorcingulate: 23       | 0.12946234 | 5.956961e-05 | 1.454169e-04 | 0.010279177 |
| precentral: 24               | 0.21356886 | 2.106062e-04 | 1.100537e-04 | 0.025863662 |
| precuneus: 25                | 0.19837843 | 1.040346e-04 | 4.382145e-04 | 0.023298807 |
| rostralanteriorcingulate: 26 | 0.10429126 | 8.291946e-05 | 1.574992e-04 | 0.006600894 |
| rostralmiddlefrontal: 27     | 0.15173198 | 4.120515e-05 | 9.756043e-05 | 0.013571889 |
| superiorfrontal: 28          | 0.11807782 | 4.337756e-05 | 4.916746e-05 | 0.010730130 |
| superiorparietal: 29         | 0.19886998 | 2.129506e-04 | 2.047426e-04 | 0.022850541 |
| superiortemporal: 30         | 0.25845599 | 8.740657e-05 | 1.749888e-04 | 0.032775807 |
| supramarginal: 31            | 0.24143904 | 8.341553e-05 | 4.195554e-04 | 0.035882348 |
| transversetemporal: 34       | 0.53976151 | 3.259074e-04 | 1.831153e-03 | 0.024633241 |
| insula: 35                   | 0.75147945 | 6.943335e-05 | 2.928809e-04 | 0.013522412 |

Table 4: FreeSurfer convexity mean and variance values per region

|                              | mu_L         | mu_R         | sig2_subj    | sig2_side    | sig2       |
|------------------------------|--------------|--------------|--------------|--------------|------------|
| caudalanteriorcingulate: 2   | 0.118733778  | 0.218756373  | 0.000000000  | 0.0041627352 | 0.09847667 |
| caudalmiddlefrontal: 3       | 0.142603415  | 0.128505096  | 0.0001723431 | 0.0030792896 | 0.40823457 |
| cuneus: 5                    | -0.188217849 | -0.236007441 | 0.0013592559 | 0.0068444630 | 0.31641205 |
| entorhinal: 6                | -0.367327588 | -0.394087214 | 0.0057705233 | 0.0087361982 | 0.13619453 |
| fusiform: 7                  | 0.227530817  | 0.158152913  | 0.0003473750 | 0.0019095904 | 0.20416742 |
| inferiorparietal: 8          | 0.073579236  | 0.030316008  | 0.0005279175 | 0.0010115500 | 0.37297250 |
| inferiortemporal: 9          | -0.227300932 | -0.093562614 | 0.0009544730 | 0.0012756580 | 0.24333934 |
| isthmuscingulate: 10         | -0.132946172 | 0.008820128  | 0.0009107362 | 0.0035642893 | 0.13513821 |
| lateraloccipital: 11         | -0.204201120 | -0.174206284 | 0.0004061473 | 0.0013482482 | 0.24066212 |
| lateralorbitofrontal: 12     | -0.054651898 | -0.110014616 | 0.0009769749 | 0.0011070491 | 0.18205332 |
| lingual: 13                  | 0.027225061  | -0.018170522 | 0.0009061470 | 0.0014122934 | 0.30229361 |
| medialorbitofrontal: 14      | -0.212249233 | -0.336624222 | 0.0005795722 | 0.0054150929 | 0.15344121 |
| middletemporal: 15           | 0.071628421  | -0.010907508 | 0.0005982494 | 0.0011834910 | 0.30967070 |
| parahippocampal: 16          | 0.087491792  | 0.035948116  | 0.0022616907 | 0.0039126025 | 0.19128481 |
| paracentral: 17              | -0.057810428 | -0.062114784 | 0.000000000  | 0.0033245646 | 0.36084282 |
| parsopercularis: 18          | -0.035535797 | 0.031557438  | 0.0012213810 | 0.0044987884 | 0.41124968 |
| parsorbitalis: 19            | -0.186196642 | -0.110181442 | 0.0013585418 | 0.0081325988 | 0.41417753 |
| parstriangularis: 20         | -0.188932229 | -0.026018515 | 0.0001323680 | 0.0069461003 | 0.41780549 |
| pericalcarine: 21            | 0.171297267  | 0.255125384  | 0.0038692211 | 0.0056984023 | 0.22148795 |
| postcentral: 22              | -0.068708047 | -0.062727424 | 0.0004219237 | 0.0013778157 | 0.38872078 |
| posteriorcingulate: 23       | 0.309138606  | 0.208582691  | 0.0004956055 | 0.0012019565 | 0.16562237 |
| precentral: 24               | 0.035019155  | 0.036391492  | 0.0003900327 | 0.0008286903 | 0.41969548 |
| precuneus: 25                | 0.040684245  | 0.112356890  | 0.0005273178 | 0.0018404424 | 0.34969709 |
| rostralanteriorcingulate: 26 | 0.263050467  | 0.225369214  | 0.0004293334 | 0.0029767907 | 0.10557882 |
| rostralmiddlefrontal: 27     | 0.002363582  | 0.009938400  | 0.0003118705 | 0.0009170744 | 0.26370457 |
| superiorfrontal: 28          | -0.122509024 | -0.109382465 | 0.0002400504 | 0.0020116352 | 0.28434453 |
| superiorparietal: 29         | 0.031060955  | 0.009850810  | 0.0002025333 | 0.0024428874 | 0.42994640 |
| superiortemporal: 30         | -0.112306773 | -0.030108818 | 0.0000783506 | 0.0011961732 | 0.45667137 |
| supramarginal: 31            | 0.033636482  | 0.109173675  | 0.000000000  | 0.0026713989 | 0.46337782 |
| transversetemporal: 34       | 0.342587711  | 0.358172282  | 0.0025759434 | 0.0046281102 | 0.21290818 |
| insula: 35                   | 0.658690708  | 0.649950765  | 0.0026419967 | 0.0019128761 | 0.27587704 |

Table 5: FreeSurfer thickness mean and variance values per region

|                              | mu_L     | mu_R     | sig2_subj   | sig2_side   | sig2      |
|------------------------------|----------|----------|-------------|-------------|-----------|
| caudalanteriorcingulate: 2   | 2.770639 | 2.784046 | 0.014854571 | 0.022279403 | 0.3985204 |
| caudalmiddlefrontal: 3       | 2.558892 | 2.785496 | 0.068478804 | 0.012540913 | 0.4790259 |
| cuneus: 5                    | 1.913028 | 2.139964 | 0.012665457 | 0.004138412 | 0.2603659 |
| entorhinal: 6                | 3.047758 | 3.217990 | 0.065682829 | 0.057534832 | 0.8188346 |
| fusiform: 7                  | 2.813329 | 2.733994 | 0.020922657 | 0.009350653 | 0.3974182 |
| inferiorparietal: 8          | 2.685422 | 2.727383 | 0.013692157 | 0.004171075 | 0.3384569 |
| inferiortemporal: 9          | 3.115784 | 2.910109 | 0.016699047 | 0.011174295 | 0.5763199 |
| isthmuscingulate: 10         | 2.858025 | 2.651990 | 0.010200465 | 0.028049292 | 0.5340505 |
| lateraloccipital: 11         | 2.371334 | 2.352359 | 0.010679654 | 0.006590075 | 0.3301511 |
| lateralorbitofrontal: 12     | 2.513763 | 2.668454 | 0.019478931 | 0.011355397 | 0.5512252 |
| lingual: 13                  | 1.846035 | 2.168769 | 0.011997320 | 0.004621341 | 0.3598591 |
| medialorbitofrontal: 14      | 2.397132 | 2.514900 | 0.018078920 | 0.011524783 | 0.5319622 |
| middletemporal: 15           | 2.891214 | 2.936113 | 0.014027593 | 0.010269694 | 0.4321235 |
| parahippocampal: 16          | 2.692659 | 2.653202 | 0.060000967 | 0.027818592 | 0.5227127 |
| paracentral: 17              | 2.398629 | 2.645474 | 0.016212140 | 0.009225692 | 0.3141635 |
| parsopercularis: 18          | 2.711755 | 2.784389 | 0.010271932 | 0.008204965 | 0.2504628 |
| parsorbitalis: 19            | 2.830011 | 2.770044 | 0.012196042 | 0.015149751 | 0.3473796 |
| parstriangularis: 20         | 2.490471 | 2.630728 | 0.012491734 | 0.009803283 | 0.3063362 |
| pericalcarine: 21            | 1.725996 | 1.783490 | 0.012327533 | 0.004868801 | 0.2176258 |
| postcentral: 22              | 2.091484 | 2.225070 | 0.014422305 | 0.006025518 | 0.3877497 |
| posteriorcingulate: 23       | 2.782130 | 2.680288 | 0.009448248 | 0.008205112 | 0.3995141 |
| precentral: 24               | 2.599958 | 2.778354 | 0.016021647 | 0.006697638 | 0.3256826 |
| precuneus: 25                | 2.622358 | 2.549997 | 0.011610984 | 0.005536870 | 0.3155480 |
| rostralanteriorcingulate: 26 | 2.861973 | 2.866584 | 0.049610033 | 0.015946495 | 0.4243849 |
| rostralmiddlefrontal: 27     | 2.358139 | 2.551242 | 0.012440702 | 0.005402452 | 0.3439743 |
| superiorfrontal: 28          | 2.623128 | 2.873055 | 0.020498676 | 0.004052127 | 0.3945112 |
| superiorparietal: 29         | 2.391569 | 2.412446 | 0.020424801 | 0.002269392 | 0.2775097 |
| superiortemporal: 30         | 2.990558 | 2.966190 | 0.018420617 | 0.007050802 | 0.4868802 |
| supramarginal: 31            | 2.574476 | 2.748686 | 0.011547750 | 0.004804002 | 0.3235135 |
| transversetemporal: 34       | 2.479728 | 2.710507 | 0.022940771 | 0.015621186 | 0.1847719 |
| insula: 35                   | 3.021156 | 3.118172 | 0.016891817 | 0.007512457 | 0.6309455 |

Table 6: Mean curvature top models and BIC scores per region

|    | top1 | top2 | top3 | BIC1           | BIC2           | BIC3           |
|----|------|------|------|----------------|----------------|----------------|
| 2  | 15   | 23   | 16   | 1405671.62841  | 1405680.65650  | 1405737.88450  |
| 3  | 23   | 15   | 24   | 4100038.32650  | 4100062.40415  | 4100109.29606  |
| 5  | 15   | 23   | 16   | 3005449.44903  | 3005462.69462  | 3005507.44909  |
| 6  | 15   | 23   | 16   | 579414.99081   | 579423.88032   | 579468.81506   |
| 7  | 23   | 15   | 24   | 4180787.55423  | 4180803.22063  | 4180856.32898  |
| 8  | 23   | 15   | 16   | 7436830.32176  | 7436831.71403  | 7436892.41283  |
| 9  | 15   | 23   | 16   | 5285465.25639  | 5285473.55638  | 5285538.56939  |
| 10 | 15   | 23   | 16   | 1206062.36202  | 1206074.86914  | 1206121.53064  |
| 11 | 15   | 23   | 16   | 7671123.73143  | 7671134.33568  | 7671194.42544  |
| 12 | 23   | 15   | 24   | 4040730.35157  | 4040731.06853  | 4040781.29852  |
| 13 | 15   | 23   | 24   | 4647806.70532  | 4647806.82832  | 4647879.94487  |
| 14 | 15   | 23   | 16   | 1914090.11214  | 1914098.15244  | 1914160.18665  |
| 15 | 15   | 23   | 16   | 6419647.73983  | 6419660.95354  | 6419722.75465  |
| 16 | 15   | 23   | 16   | 968083.02936   | 968086.67297   | 968145.92115   |
| 17 | 15   | 23   | 16   | 2469727.56518  | 2469740.68083  | 2469794.36457  |
| 18 | 15   | 23   | 16   | 2428738.30015  | 2428749.07805  | 2428803.62514  |
| 19 | 15   | 23   | 16   | 1112372.87289  | 1112385.12969  | 1112435.42463  |
| 20 | 15   | 23   | 16   | 2318929.97109  | 2318942.95787  | 2318998.43938  |
| 21 | 15   | 23   | 16   | 2036791.34509  | 2036799.07569  | 2036858.18968  |
| 22 | 23   | 15   | 24   | 7170440.39145  | 7170449.78402  | 7170513.46440  |
| 23 | 15   | 23   | 24   | 1828064.95718  | 1828065.72079  | 1828131.61927  |
| 24 | 15   | 23   | 16   | 7559815.64969  | 7559829.83115  | 7559879.93021  |
| 25 | 15   | 23   | 16   | 5791398.44336  | 5791457.82998  | 5791471.62217  |
| 26 | 23   | 15   | 24   | 522213.88602   | 1522238.12250  | 1522282.55119  |
| 27 | 15   | 23   | 16   | 6918718.40945  | 6918727.61529  | 6918784.54003  |
| 28 | 23   | 15   | 16   | 12023970.92870 | 12023978.33195 | 12024047.79474 |
| 29 | 23   | 15   | 24   | 7033779.40343  | 7033782.46490  | 7033849.12479  |
| 30 | 15   | 23   | 16   | 7387359.80076  | 7387406.72495  | 7387436.36871  |
| 31 | 15   | 23   | 16   | 5703414.41702  | 5703421.48104  | 5703481.17729  |
| 34 | 15   | 23   | 16   | 524415.89703   | 524422.74899   | 524475.50554   |
| 35 | 15   | 23   | 16   | 2719704.56470  | 2719710.37649  | 2719771.66897  |

Table 7: Travel depth top models and BIC scores per region

|    | top1 | top2 | top3 | BIC1           | BIC2           | BIC3           |
|----|------|------|------|----------------|----------------|----------------|
| 2  | 15   | 23   | 16   | 1616038.07003  | 1616050.70657  | 1616082.84289  |
| 3  | 15   | 23   | 16   | 5081706.55612  | 5081717.74058  | 5081768.93139  |
| 5  | 15   | 23   | 16   | 3949418.80977  | 3949430.06884  | 3949474.21333  |
| 6  | 15   | 23   | 16   | 624187.03028   | 624195.88352   | 624231.39879   |
| 7  | 15   | 23   | 16   | 4920265.50402  | 4920278.73237  | 4920323.12746  |
| 8  | 15   | 23   | 16   | 9242089.36772  | 9242097.61082  | 9242151.94746  |
| 9  | 15   | 23   | 16   | 6041292.26431  | 6041305.27249  | 6041356.90278  |
| 10 | 15   | 23   | 16   | 1440185.45055  | 1440195.79288  | 1440241.23852  |
| 11 | 23   | 15   | 24   | 8971129.32578  | 8971137.64898  | 8971188.64460  |
| 12 | 15   | 23   | 16   | 5034328.70975  | 5034341.61507  | 5034386.90849  |
| 13 | 15   | 23   | 16   | 5763122.63192  | 5763132.06231  | 5763181.94591  |
| 14 | 15   | 23   | 16   | 2025976.59513  | 2025986.27611  | 2026037.17759  |
| 15 | 15   | 23   | 16   | 7999435.73620  | 7999449.75654  | 7999495.15620  |
| 16 | 15   | 23   | 16   | 1120558.32892  | 1120570.52853  | 1120607.50542  |
| 17 | 15   | 23   | 16   | 2981362.82103  | 2981371.09526  | 2981416.54968  |
| 18 | 15   | 23   | 16   | 3200600.41026  | 3200611.20106  | 3200652.66607  |
| 19 | 15   | 23   | 16   | 1419628.44797  | 1419636.33745  | 1419680.82525  |
| 20 | 15   | 23   | 16   | 2937524.12494  | 2937534.61200  | 2937581.51254  |
| 21 | 15   | 23   | 16   | 2546118.62159  | 2546129.71963  | 2546166.60859  |
| 22 | 23   | 15   | 24   | 9523173.95583  | 9523207.40245  | 9523234.23348  |
| 23 | 15   | 23   | 16   | 2235288.12415  | 2235300.98612  | 2235328.87088  |
| 24 | 23   | 15   | 24   | 9713776.13790  | 9713793.72908  | 9713838.90951  |
| 25 | 15   | 23   | 16   | 7231575.70930  | 7231588.79287  | 7231637.30322  |
| 26 | 15   | 23   | 16   | 1714496.04184  | 1714508.70889  | 1714546.10200  |
| 27 | 15   | 23   | 16   | 7937522.74472  | 7937536.81763  | 7937587.96242  |
| 28 | 23   | 15   | 24   | 13566340.78166 | 13566350.97783 | 13566412.24750 |
| 29 | 15   | 23   | 16   | 8773547.66412  | 8773561.55858  | 8773612.67964  |
| 30 | 15   | 23   | 16   | 9751901.67622  | 9751914.00651  | 9751965.33389  |
| 31 | 15   | 23   | 16   | 7651806.03929  | 7651817.65426  | 7651865.39067  |
| 34 | 15   | 23   | 16   | 902541.95449   | 902552.54590   | 902587.79071   |
| 35 | 15   | 23   | 16   | 3497841.13346  | 3497851.29890  | 3497896.17261  |

Table 8: FreeSurfer convexity top models and BIC scores per region

|    | top1 | top2 | top3 | BIC1          | BIC2          | BIC3          |
|----|------|------|------|---------------|---------------|---------------|
| 2  | 15   | 23   | 16   | 160849.40042  | 160862.03696  | 160926.89914  |
| 3  | 15   | 23   | 16   | 1504178.56256 | 1504191.90689 | 1504262.86431 |
| 5  | 15   | 23   | 16   | 1026124.46392 | 1026137.78124 | 1026194.05836 |
| 6  | 15   | 23   | 16   | 98060.00435   | 98071.51562   | 98122.92070   |
| 7  | 15   | 23   | 16   | 1054052.74098 | 1054066.37213 | 1054136.08325 |
| 8  | 15   | 23   | 16   | 2604806.17921 | 2604815.50687 | 2604891.48791 |
| 9  | 15   | 23   | 16   | 1458373.76151 | 1458386.01718 | 1458456.87421 |
| 10 | 15   | 23   | 16   | 226661.64073  | 226674.14785  | 226740.63306  |
| 11 | 15   | 23   | 16   | 2172068.81490 | 2172081.08940 | 2172151.10408 |
| 12 | 15   | 23   | 16   | 934177.15348  | 934189.33716  | 934257.63054  |
| 13 | 15   | 23   | 16   | 1554038.28269 | 1554051.27092 | 1554122.56653 |
| 14 | 15   | 23   | 16   | 383372.45149  | 383385.34300  | 383452.23297  |
| 15 | 15   | 23   | 16   | 2045071.20218 | 2045081.98262 | 2045154.19950 |
| 16 | 15   | 23   | 16   | 236027.41552  | 236039.61491  | 236103.48933  |
| 17 | 15   | 23   | 16   | 903935.48692  | 903948.60257  | 904016.41049  |
| 18 | 15   | 23   | 16   | 901713.08066  | 901725.47795  | 901784.94090  |
| 19 | 15   | 23   | 16   | 412372.97157  | 412383.92239  | 412443.26594  |
| 20 | 15   | 23   | 16   | 858801.51422  | 858814.50100  | 858880.28879  |
| 21 | 23   | 15   | 24   | 563618.44260  | 563622.63552  | 563696.70842  |
| 22 | 15   | 23   | 16   | 2626454.34578 | 2626463.59356 | 2626540.64792 |
| 23 | 15   | 23   | 16   | 401426.49573  | 401439.29188  | 401507.55196  |
| 24 | 15   | 23   | 16   | 2840749.19664 | 2840801.75346 | 2840835.72672 |
| 25 | 15   | 23   | 16   | 2005613.32736 | 2005627.25777 | 2005695.79436 |
| 26 | 15   | 23   | 16   | 187841.04404  | 187853.71109  | 187922.26725  |
| 27 | 15   | 23   | 16   | 1947549.85636 | 1947561.19595 | 1947635.80679 |
| 28 | 15   | 23   | 16   | 3671265.55541 | 3671271.30560 | 3671350.04690 |
| 29 | 15   | 23   | 16   | 2645742.28301 | 2645754.34761 | 2645827.79002 |
| 30 | 15   | 23   | 16   | 2879321.74036 | 2879334.34007 | 2879412.27097 |
| 31 | 15   | 23   | 16   | 2228414.69407 | 2228428.58361 | 2228502.54265 |
| 34 | 15   | 23   | 16   | 176073.48213  | 176085.30134  | 176147.53910  |
| 35 | 15   | 23   | 16   | 872969.70773  | 872982.94813  | 873028.72474  |

Table 9: FreeSurfer thickness top models and BIC scores per region

|    | top1 | top2 | top3 | BIC1          | BIC2          | BIC3          |
|----|------|------|------|---------------|---------------|---------------|
| 2  | 15   | 23   | 16   | 590972.00900  | 590978.24907  | 591038.11853  |
| 3  | 23   | 15   | 24   | 1628395.46894 | 1628418.21253 | 1628467.68067 |
| 5  | 15   | 23   | 16   | 907754.88882  | 907766.91378  | 907830.77689  |
| 6  | 23   | 15   | 24   | 304562.95009  | 304586.60001  | 304622.39725  |
| 7  | 23   | 15   | 24   | 1615911.30133 | 1615943.70309 | 1615982.46765 |
| 8  | 15   | 23   | 16   | 2468633.83891 | 2468634.73945 | 2468705.85753 |
| 9  | 15   | 23   | 16   | 2339695.21941 | 2339705.54212 | 2339768.74922 |
| 10 | 23   | 15   | 24   | 598351.46259  | 598353.79696  | 598417.50499  |
| 11 | 15   | 23   | 16   | 2658006.38688 | 2658014.44814 | 2658084.86942 |
| 12 | 23   | 15   | 24   | 1845887.92002 | 1845897.62099 | 1845960.27277 |
| 13 | 23   | 15   | 24   | 1719249.24373 | 1719250.18258 | 1719324.64928 |
| 14 | 23   | 15   | 24   | 876867.36748  | 876870.05735  | 876935.41564  |
| 15 | 15   | 23   | 16   | 2454405.64620 | 2454407.64792 | 2454479.84667 |
| 16 | 23   | 15   | 24   | 436019.71514  | 436036.84659  | 436084.66897  |
| 17 | 23   | 15   | 16   | 835478.91088  | 835481.43235  | 835545.27991  |
| 18 | 15   | 23   | 16   | 672801.70348  | 672812.80283  | 672869.20808  |
| 19 | 15   | 23   | 16   | 375572.12924  | 375584.38604  | 375638.73389  |
| 20 | 15   | 23   | 16   | 723540.80473  | 723553.05191  | 723610.77949  |
| 21 | 15   | 23   | 16   | 556243.37257  | 556253.47878  | 556314.80509  |
| 22 | 23   | 15   | 24   | 2623362.28702 | 2623371.11746 | 2623440.28162 |
| 23 | 15   | 23   | 16   | 741000.36920  | 741002.50802  | 741067.95104  |
| 24 | 15   | 23   | 16   | 2475603.97245 | 2475612.40152 | 2475675.84290 |
| 25 | 15   | 23   | 16   | 1890675.47438 | 1890688.90804 | 1890748.78241 |
| 26 | 23   | 15   | 24   | 629185.51525  | 629221.25310  | 629252.24338  |
| 27 | 23   | 15   | 24   | 2291675.48439 | 2291683.63118 | 2291751.51869 |
| 28 | 23   | 15   | 24   | 4432048.80889 | 4432058.47871 | 4432125.99475 |
| 29 | 23   | 15   | 24   | 2065262.19787 | 2065284.38157 | 2065341.30492 |
| 30 | 15   | 23   | 16   | 2969552.42402 | 2969560.35853 | 2969622.45350 |
| 31 | 15   | 23   | 16   | 1841837.66063 | 1841843.92697 | 1841906.92511 |
| 34 | 15   | 23   | 16   | 157122.83662  | 157134.65583  | 157179.93557  |
| 35 | 15   | 23   | 24   | 1338553.30397 | 1338553.50312 | 1338621.23296 |
